# Supplementary material for: CCR5-edited CD4+ T cells augment HIV-specific immunity to enable post-rebound control of HIV replication
Source: JCI journal article supplement (doi:10.1172/jci144486), 2021-02-11
Supplement: sd3 [file 3]

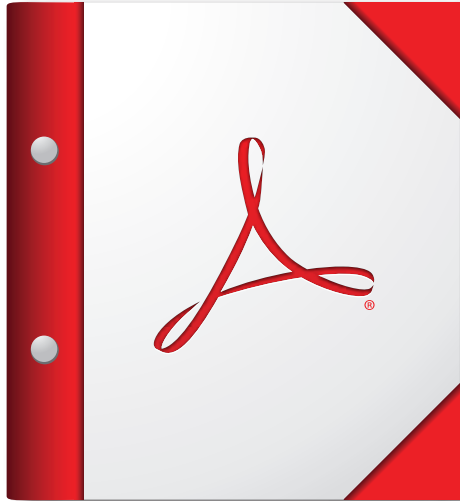

**For the best experience, open this PDF portfolio in  
Acrobat X or Adobe Reader X, or later.**

[Get Adobe Reader Now!](#)
